# Supplementary material for: From biopolymers to Pickering emulsions: a green chemistry strategy to replace microplastics in next-generation cosmetics
Source: Royal Society of Chemistry journal article supplement (doi:10.1039/d6ra01252c), 2026-04-20
Supplement: d6ra01252c1.pdf [file d6ra01252c1.pdf]

## Supporting Information

Table S1. Composition (% w/w) of the base emulsion system employed as the reference formulation.

| Ingredients          | INCI                                                    | Function                       | (%)   |
|----------------------|---------------------------------------------------------|--------------------------------|-------|
| <b>Aqueous phase</b> |                                                         |                                |       |
| Water                | Aqua                                                    | Main solvent                   | 85.51 |
| Glycerin             | Glycerin                                                | Humectant                      | 5.00  |
| Potassium sorbate    | Potassium Sorbate                                       | Preservative                   | 0.20  |
| Vivapur CS TEX Easy  | Microcrystalline Cellulose, Cellulose Gum e Xanthan Gum | Thickener, rheology stabilizer | 5.50  |
| <b>Oil phase</b>     |                                                         |                                |       |
| Sunflower oil        | Helianthus Annuus Seed Oil                              | Emollient                      | 2.53  |
| Plum oil             | Prunus Domestica Seed Oil                               | Emollient                      | 1.26  |

Table S2. Formulation ingredients (% w/w) for emulsion development.

| Ingredients             | F0    | F1    | F2    | F3    | F4    |
|-------------------------|-------|-------|-------|-------|-------|
| <b>Aqueous phase</b>    |       |       |       |       |       |
| Water                   | 85.51 | 85.51 | 85.51 | 85.51 | 85.51 |
| Glycerin                | 5.00  | 5.00  | 5.00  | 5.00  | 5.00  |
| Potassium sorbate       | 0.20  | 0.20  | 0.20  | 0.20  | 0.20  |
| Vivapur CS TEX Easy     | 5.50  | 2.75  | 2.75  | 2.75  | 1.50  |
| Native tapioca starch   | -     | 2.75  | -     | -     | -     |
| Tapioca with oleic acid | -     | -     | 2.75  | -     | -     |
| Tapioca with PMW        | -     | -     | -     | 2.75  | 4.00  |
| <b>Oil phase</b>        |       |       |       |       |       |
| Sunflower oil           | 2.53  | 2.53  | 2.53  | 2.53  | 2.53  |
| Plum oil                | 1.25  | 1.26  | 1.26  | 1.26  | 1.26  |

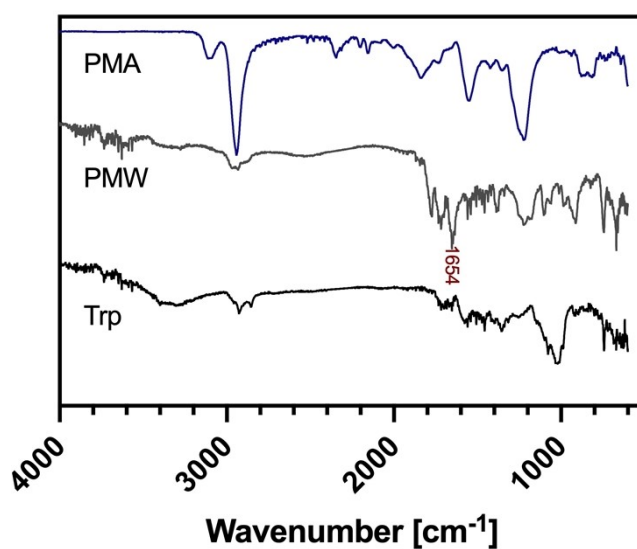

Figure S1. Comparison of FT-IR spectra of poly(isobutylene-alt-maleic anhydride) (PMA), Tryptophan(Trp) and tryptophan-grafted-poly(isobutylene-alt-maleic anhydride) (PMW).

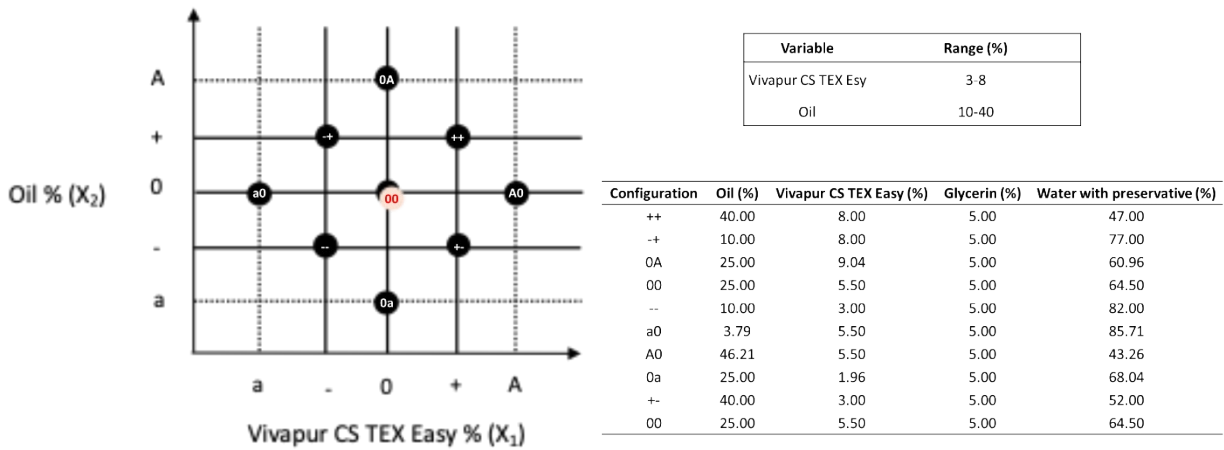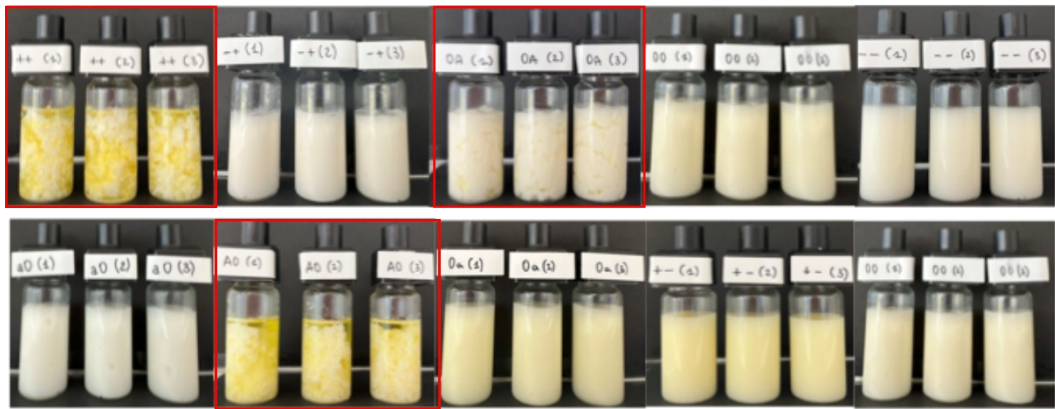

Figure S2. Representative images of samples generated through the Design of Experiments (DoE). Red boxes denote conditions leading to the formation of visible yellow aggregates or precipitates.

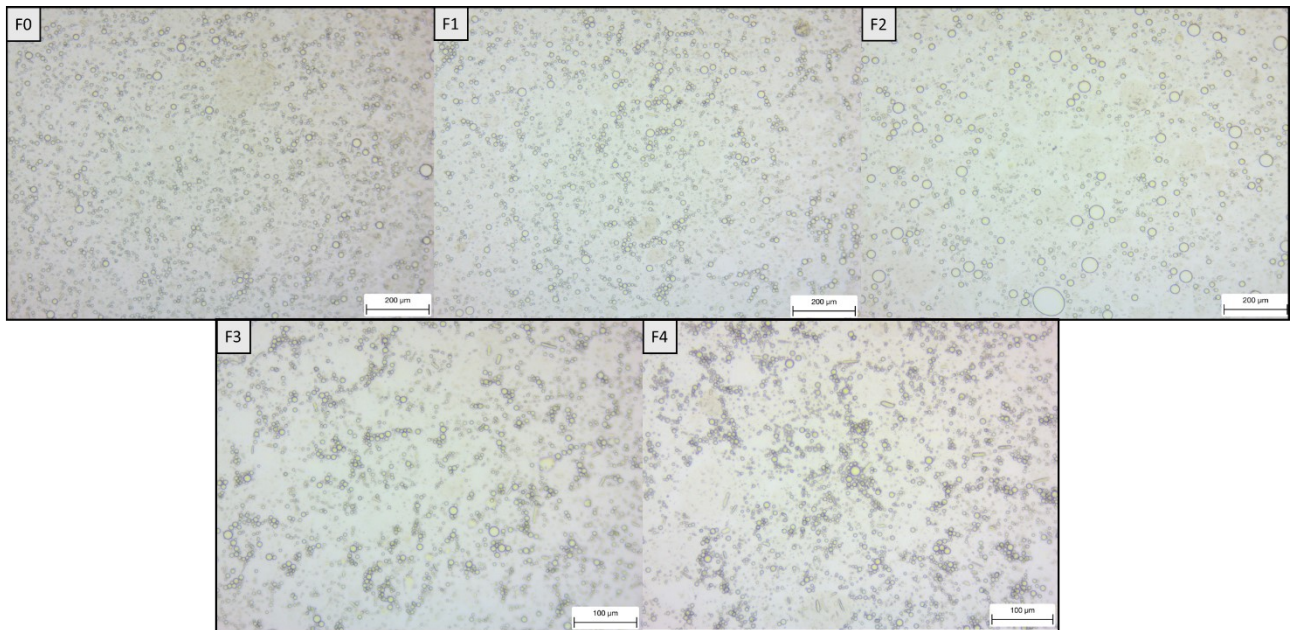

|    | Median D ( $\mu\text{m}$ ) | Modal D ( $\mu\text{m}$ ) | Mean V ( $\mu\text{m}$ ) | Std Dev ( $\mu\text{m}$ ) |
|----|----------------------------|---------------------------|--------------------------|---------------------------|
| F0 | 14.02                      | 12.34                     | 14.34                    | 3.30                      |
| F1 | 16.27                      | 11.77                     | 17.35                    | 5.83                      |
| F2 | 17.56                      | 26.90                     | 20.00                    | 8.37                      |
| F3 | 6.70                       | 7.11                      | 6.69                     | 1.38                      |
| F4 | 7.17                       | 6.77                      | 7.27                     | 2.53                      |

*Figure S3. Representative optical micrographs of the emulsions with associated particle size statistics (median, mode, mean, and standard deviation) obtained through granulometric analysis.*

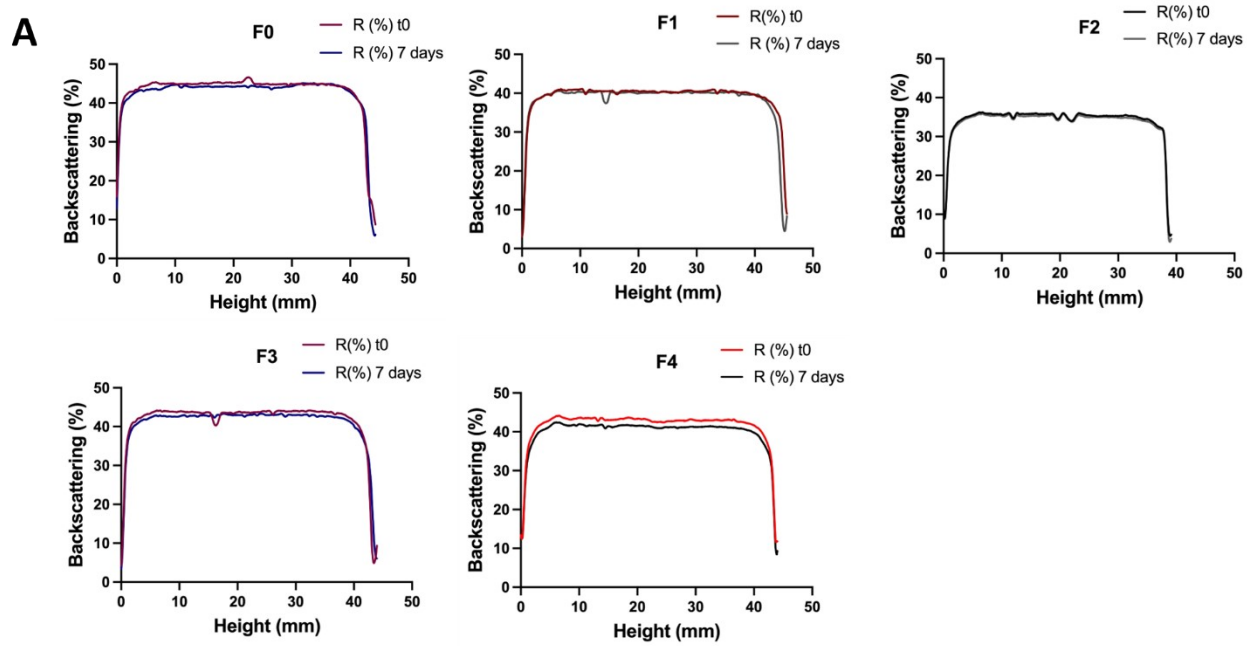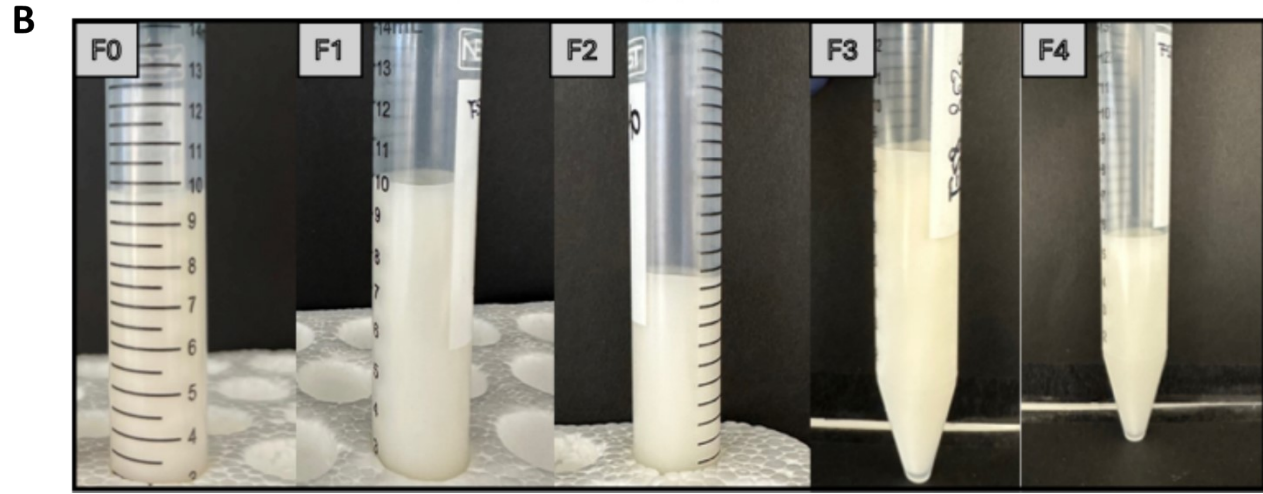

Figure S4. Emulsion stability of formulations F0–F4 evaluated by (a) Turbiscan analysis at initial ( $t_0$ ) and 7-day time points, and (b) visual inspection after accelerated centrifugation.
